1 **Neural Mechanisms Underlying Attention Control In Relation To Anxiety And**  
2 **Depressive Symptoms**

3 *The Mediating Role of Frontoparietal-/Dorsal Attention-Somatomotor Resting State*  
4 *Functional Connections on the Correlation of Attention Control with Anxiety and Depression*

5

6 Raye Fion Loh<sup>1</sup>, Savannah Siew Kiah Hui<sup>1</sup>, Junhong Yu<sup>1</sup>

7 <sup>1</sup>Cognitive and Brain Health Laboratory, Department of Psychology, School of Social  
8 Sciences, Nanyang Technological University, 50 Nanyang Avenue, S(639798), Singapore

9

10 *This work is supported by funding from the Nanyang Assistant Professorship (Award no.*  
11 *021080-00001)*

12

13 **Corresponding Author:**

14 Junhong Yu

15 [junhong.yu@ntu.edu.sg](mailto:junhong.yu@ntu.edu.sg)

16 **Abstract**

17 Poor attention control has been implicated in the development of anxiety and depression-  
18 related disorders and it is a key diagnostic criterion. This study aims to understand the possible  
19 neural mechanisms behind this.

20 191 German participants aged 20-80 were assessed on their level of attention control,  
21 depression and anxiety as part of the Leipzig Study for Mind-Body-Emotion Interactions.  
22 Network-based statistics were applied to their resting-state functional connectivity (rsFC) data  
23 to identify networks positively and negatively associated with attention control. Mediation  
24 analyses were then performed with these two networks as mediators.

25 Attention control correlated negatively with both anxiety and depression. The frontoparietal-  
26 or dorsal attention-somatomotor connections featured prominently in the attention control-  
27 positive network (ACPN). This network correlated positively with attention control, and  
28 negatively with both anxiety and depression. The attention control-negative network (ACNN)  
29 was largely represented by the ventral attention- or dorsal attention-visual connections. The  
30 ACPN was a significant and partial mediator between attention control and anxiety and a  
31 complete mediator for the relationship between attention control and depression. These  
32 findings could prove useful as neuroeducation in anxiety- and depression-related disorders, and  
33 as evidence for attention-based therapy.

34

35 *Keywords:* Resting-state functional connectivity; Attention control; Depression; Anxiety;  
36 Network-based statistics; Mediation analysis

37

## 38 1. Introduction

39 Anxiety disorders are common psychiatric disorders and major causes of disability and  
40 mortality throughout the world. Despite its adaptive benefits, anxiety becomes pathological  
41 when an individual starts to experience intense anxiety far beyond the expected levels for the  
42 situation, leading to excessive worry, hypervigilance, physiological arousal, and avoidance  
43 behaviours [1], depleting mental resources, reducing cognitive efficiency and negatively  
44 influencing daily functioning and quality of life [2, 3].

45 Depressive disorders are also highly prevalent and are characterised by emotional,  
46 cognitive, and physical symptoms [4]. Patients with depressive disorder have been frequently  
47 reported to present with cognitive impairment in several cognitive domains [5, 6] such as  
48 executive function [e.g. 9-12], episodic memory [e.g. 7, 13-17], semantic memory [e.g. 12, 18-  
49 22], visuo-spatial memory [e.g. 23, 24], and information processing speed [e.g. 6, 12, 17, 20-  
50 22]. Anxiety and depression symptoms often overlap significantly [25], which may point to  
51 possible underlying vulnerabilities that result in continued symptom perpetuation. One such  
52 underlying vulnerability may be poor attention control. Several depression models [26-28]  
53 have identified deficiencies in attention control and recurrent negative thinking (i.e.,  
54 rumination) as important elements in the development and maintenance of negative affect.  
55 Therapies effective at reducing anxiety from baseline levels include those that support active  
56 goal-focused attention and flexible cognitive control, particularly inhibitory control [29]. This  
57 similarly suggests poor attention control is implicated in anxiety symptoms. The frequent co-  
58 occurrence of attention control deficits and anxiety symptoms could perhaps be explained by  
59 the possibility that both implicate the same resting-state networks. Resting-state functional  
60 connectivity (rsFC) can be quantified by the degree of temporal co-activation of spontaneous  
61 fMRI signals between various brain areas in the absence of a perceptual or behavioural task  
62 [30], and is helpful for measuring mind-wandering states such as attention control [31].

63           Hence, in the current study, we hypothesise that certain resting-state networks mediate  
64 the relationship between attention control and depression/anxiety in the non-clinical  
65 population. Few brain imaging studies have investigated this correlation in non-clinical  
66 populations. Even though these sub-clinical anxiety-related and depressive disorders are less  
67 understood as compared to their clinically significant counterparts [32], they are still prevalent  
68 [33, 34], often being associated with lower levels of quality of life [34-36], increased use of  
69 health services [34, 37], increased economic costs [33, 34] and higher mortality rates [34, 38].  
70 More importantly, they are often early warning markers of subsequent clinical diagnosis [33,  
71 38-40]. In addition, there have been few studies investigating the effect of attention control on  
72 the presentation of anxiety- and depression-related symptoms across the lifespan. Most studies  
73 mentioned above recruited participants who were young adults. However, anxiety and  
74 depression symptoms are not limited to young adults; rather, they are applicable even to the  
75 elderly [41].

76

## 77 **2. Material & Methods**

### 78 **2.1 Participants**

79 Datasets from an openly accessible anonymized database, the Leipzig Study for Mind-  
80 Body-Emotion Interactions project [42] and an additional follow-up project [43] were used in  
81 this study and details regarding recruitment and study procedure can be found there. This pThe  
82 study protocol was approved by the University of Leipzig's medical faculty's ethics committee  
83 (reference number 097/15-ff) [43]. The database was accessed on January 8, 2022, and there  
84 was no available access to identifying information.

85 Data from 13 subjects were eventually excluded (12 due to significant head motion  
86 during rs-fMRI scans, 1 due to missing data), leaving a total of 191 native German-speaking  
87 participants (92 females, 99 males). The specific age of each participant was not supplied in  
88 the dataset; instead, the age of each person is expressed in 5-year bins as shown in Figure 1.

### 89 **2.2. Measures**

90 The Attention Control Scale [ACS] [42] was used in this study to evaluate individual  
91 differences in attention control. It is a self-report questionnaire with 20 items and it measures  
92 an individual's ability (a) to focus, (b) to orientate attention between tasks and (c) to control  
93 thought flexibly. Participants responded on a 4-point Likert scale (1 = almost never; 2 =  
94 sometimes; 3 = often; 4 = always), where a higher score reflected greater attention control  
95 ability.

96 The Hospital Anxiety and Depression Scale [HADS] [45] was employed in this study  
97 to assess subclinical tendencies of depression and anxiety. It consists of 14 questions and two  
98 subscales measuring (a) anxiety [HADS.A] and (b) depression [HADS.D] across the past week.  
99 Each subscale has seven items and it is scored on a 4-point Likert scale (e.g., 1 = most of the  
100 time, 4 = never). A higher score represented higher anxiety and depression symptoms.

### 101 **2.3. fMRI acquisition**

102 The full fMRI acquisition details may be obtained from [42, 43]. Magnetic resonance  
103 imaging (MRI) was done using a 3 Tesla scanner equipped with a 32-channel head coil.  
104 Magnetization Prepared 2 Rapid Acquisition Gradient Echoes (MP2RAGE) procedure was  
105 used to collect T1-weighted images (TE=2920ms; TR=5000ms; TI1=700ms; TI2=2500ms;  
106 FOV=256mm; 176 sagittal slices; voxel size=1mm isotropic). T2-weighted gradient echo  
107 planar imaging (EPI) multiband BOLD technique (TR = 1,400 ms; TE = 30 ms; 64 axial slices;  
108 matrix = 88 x 88; voxel size = 2.3mm isotropic) was used to acquire the resting-state fMRI (rs-  
109 fMRI) volumes. Participants were told to stay awake and lie motionless with their eyes open  
110 while staring at a low-contrast fixation cross.

#### 111 **2.4. Data pre-processing**

112 The T1 structural images were preprocessed with FreeSurfer 7.2.0 using the default  
113 recon-all options. Non-brain tissue was removed using a hybrid watershed or surface  
114 deformation procedure [46], automated Talairach transformation, segmentation of subcortical  
115 white matter and deep grey matter volumetric structures (including the hippocampus,  
116 amygdala, caudate, putamen, ventricles) [47, 48], intensity normalisation [49], tessellation [50,  
117 51]. When the cortical models were finished, they were registered to a spherical atlas based on  
118 individual cortical folding patterns to match cortical geometry across participants [52], and the  
119 cerebral cortex was divided into units based on gyral and sulcal structure.

120 fMRIPrep 20.2.5 was used to preprocess the resting fMRI volumes [53]. Slice time was  
121 adjusted using 3dTshift from AFNI [54] and the motion was corrected using MCFLIRT [55].  
122 Following this, co-registration to the matching T1w was performed using boundary-based  
123 registration [56] with 9 degrees of freedom, using bbregister from freesurfer. Motion correction  
124 transformations, BOLD-to-T1w transformations, and T1w-to-template (MNI) warps were  
125 combined and applied in a single step with antsApplyTransforms and Lanczos interpolation.

126           Following that, using the load confounds package (<https://github.com/SIMEXP/load>  
127 confounds), these preprocessed volumes were denoised by regressing out 6 motion parameters,  
128 the average signal of white matter and cerebrospinal fluid masks, global signal and their  
129 derivatives, as well as cosines covering the slow time drift frequency band. Scrubbing was used  
130 to reduce the effects of excessive head motion [57]. After that, the volumes are smoothed with  
131 a 5mm FWHM kernel and sent through a 0.1Hz low-pass filter. Finally, the brainnetome atlas  
132 [58] was used to divide the whole brain into 246 anatomical areas that corresponded to network  
133 nodes. Participants with significant head motion are omitted from the analysis if more than  
134 20% of their rs-fMRI volumes are over the high motion limit (relative RMS > 0.25).

## 135 **2.5. Statistical analysis**

### 136 **2.5.1. Network-based statistics.**

137           First, network-based statistics were carried out on the rsFC matrices to obtain edges  
138 correlated with attention control. The selection thresholds were set at  $p < .01$  and  $p < .05$  at the  
139 edge and network levels respectively. Significant edges were separated into those positively  
140 correlated with attention control, labelled as the attention control-positive network (ACPN),  
141 and those negatively correlated with attention control, labelled as the attention control-negative  
142 network (ACNN). Connectivity scores for each participant were calculated for both positive  
143 and negative networks based on the connectivity strength of each network such that the greater  
144 the network score, the greater the connectivity strength of the networks. These analyses were  
145 performed in R (version 4.1.0) using the *NBR* package [59].

### 146 **2.5.2 Mediation analysis.**

147           Subsequently, the ACPN and ACNN scores were used as individual mediators of the  
148 connection between attention control and anxiety, as well as attention control and depression.  
149 This analysis was conducted in R with the mediation package [60], employing a statistical

150 significance of  $p < 0.05$ , with quasi-Bayesian confidence intervals with 1000 Monte Carlo  
151 simulations.

### 152 **2.5.3. Data and code availability.**

153 The preprocessed rsFC matrices, behavioural scores of the participants studied, and the  
154 R code for the analysis may be found at [osf.io/f2qd6](https://osf.io/f2qd6).

155



## 156 **3. Results**

### 157 **3.1. Network-based analysis**

158 The attention control-related brain connection patterns are shown in Figure 2. The  
159 edges were classified into seven brain networks [61]. Attention control is positively associated  
160 with increased somatomotor-frontoparietal and somatomotor-dorsal attention connectivity.  
161 Strong positive connections can be observed between the frontoparietal and somatomotor  
162 networks, as well as between the dorsal attention and somatomotor networks. More  
163 specifically, there were stronger connections between the primary motor cortex and parts of  
164 the dorsal and medial prefrontal cortex. Attention control is negatively associated with  
165 decreased visual-ventral and visual-dorsal attention connectivity. Strong negative connections  
166 can be observed between dorsal attention and visual networks, as well as between ventral  
167 attention and visual networks, between the caudal dorsolateral region and the left inferior  
168 occipital gyrus, left occipital polar cortex, left medial superior occipital gyrus and left lateral  
169 superior occipital gyrus as well as opercular area 44 and right inferior occipital gyrus, right  
170 medial superior occipital gyrus, right rostral lingual gyrus.

### 171 **3.2. Mediation Analysis**

172 Attention control positively predicted anxiety and depression symptoms. Attention  
173 control also positively predicted ACPN and negatively predicted ACNN. ACPN negatively  
174 predicted both anxiety and depression symptoms, while ACNN positively predicted both  
175 anxiety and depression symptoms. These findings were all significant and are reflected in Table  
176 1.

#### 177 **Table 1.**

178 *Summary of All the Regression Analyses Not Yet Accounting for the Mediator.*

| Predictor | Outcome    | Standardised Estimate | Standard Error | p-value   |
|-----------|------------|-----------------------|----------------|-----------|
| Attention | Anxiety    | -0.27                 | 0.070          | <0.001*** |
| Control   | Depression | -0.25                 | 0.070          | <0.001*** |
|           | ACPN       | 0.52                  | 0.062          | <0.001*** |
|           | ACNN       | -0.45                 | 0.065          | <0.001*** |
| ACPN      | Anxiety    | -0.27                 | 0.070          | <0.001*** |
|           | Depression | -0.27                 | 0.070          | <0.001*** |
| ACNN      | Anxiety    | 0.17                  | 0.072          | 0.021*    |
|           | Depression | 0.17                  | 0.072          | 0.0192*   |

179

180 The effect of attention control on anxiety was found to be partially mediated via the  
 181 ACPN but was not significantly mediated via the ACNN. Results of the mediation analysis for  
 182 anxiety are shown in Table 2 and Figure 3. The effect of attention control on depression was  
 183 fully mediated via the ACPN but was not significantly mediated via the ACNN. These results  
 184 can be found in Table 3 and Figure 4.

185

186 **Table 2.**

187 *Estimates of the ACPN- and ACNN-mediated Model of Attention Control Against Anxiety.*

| Predictor |                     | Estimates | 95% CI<br>Lower | 95% CI<br>Upper | p-value   |
|-----------|---------------------|-----------|-----------------|-----------------|-----------|
| ACPN      | ACME                | -0.0276   | -0.0554         | 0.00            | 0.030*    |
|           | ADE                 | -0.0589   | -0.1167         | -0.01           | 0.030*    |
|           | Total Effect        | -0.0865   | -0.1350         | -0.04           | <0.001*** |
|           | Proportion Mediated | 0.3196    | 0.0399          | 0.88            | 0.030*    |
| ACNN      | ACME                | -0.00772  | -0.02958        | 0.01            | 0.410     |
|           | ADE                 | -0.07878  | -0.13097        | -0.02           | 0.006**   |
|           | Total Effect        | -0.08650  | -0.13488        | -0.04           | <0.001*** |
|           | Proportion Mediated | 0.08929   | -0.13094        | 0.50            | 0.410     |

188

189 *Note.* ACME, average causal mediation effect; ADE, average direct effect. \*p < 0.05

190 **Table 3**

191 Estimates of the ACPN- and ACNN-mediated Model of Attention Control Against Depression.

| Predictor |                     | Estimates | 95% CI<br>Lower | 95% CI<br>Upper | p-value   |
|-----------|---------------------|-----------|-----------------|-----------------|-----------|
| ACPN      | ACME                | -0.101    | -0.181          | -0.03           | 0.008**   |
|           | ADE                 | -0.147    | -0.309          | 0.01            | 0.064     |
|           | Total Effect        | -0.248    | -0.406          | -0.11           | <0.001*** |
|           | Proportion Mediated | 0.406     | 0.114           | 1.07            | 0.008**   |
| ACNN      | ACME                | -0.0138   | -0.0412         | 0.01            | 0.34      |
|           | ADE                 | -0.0914   | -0.1591         | -0.02           | 0.01**    |
|           | Total Effect        | -0.1052   | -0.1682         | -0.05           | <0.001*** |
|           | Proportion Mediated | 0.1315    | -0.1509         | 0.56            | 0.34      |

192

193 *Note.* ACME, average causal mediation effect; ADE, average direct effect. \*p < 0.05

194

#### 195 4. Discussion

196 This study identified rsFC positively and negatively associated with attention control. The  
197 pattern of edges in these networks reflected an increased somatomotor- frontoparietal and  
198 dorsal attention-somatomotor connectivity, and a decreased dorsal attention-visual and ventral  
199 attention-visual connectivity in attention control. The ACPN partially mediated the effect of  
200 attention control on anxiety and fully mediated the effect of attention control on depression.  
201 On the other hand, the ACNN did not significantly mediate the relationship between attention  
202 control and anxiety or depression.

203 What is surprising about the results is the increased connectivity between the frontoparietal  
204 network and dorsal attention network with the somatomotor network in attention control. The  
205 current literature on the role of the frontoparietal- and/or dorsal attention-somatosensory  
206 network on attention mostly comprises clinical groups with attention deficits, namely in ADHD  
207 populations. A mix of findings have been found, such as stronger connections in an ADHD  
208 population between the white matter rsFC of the default mode network and the somatomotor  
209 network with the other networks [62], increased visual-dorsal attention connectivity [63] and  
210 increased surfaced-based brain rsFC within the limbic, visual default mode, somatomotor,  
211 dorsal attention, frontoparietal and VANs [64]. Poor sustained attention in this population was  
212 also associated with stronger positive connectivity within the motor network bilaterally and  
213 between motor, parietal, prefrontal, and limbic networks in a task-based functional connectivity  
214 study [65]. Poor motor control has been observed in ADHD children, which may imply a lower  
215 somatomotor activity correlation with inattentiveness [66]. Other studies did look at the  
216 somatotopic (spatial) attention modulation of behaviour in non-clinical populations, but they  
217 were mainly limited to the neural processing of tactile stimuli [67-73, 104] and most do not  
218 investigate functional connectivity of the somatosensory region with other regions of the brain.

219 To the best of our knowledge, this paper is the first to look into the rsFC of attention control in  
220 all age groups and non-clinical populations. The implication of the somatomotor network in  
221 attention may have to do with the fact that the ACS measured a somatic component of attention,  
222 such as one's ability to alternate between different modalities of external sensory input (e.g.  
223 "When I am reading or studying, I am easily distracted if there are people talking in the same  
224 room.") or regulate internal sensory input (e.g. "When concentrating I ignore feelings of hunger  
225 or thirst."). In comparison, the attention control measures in previous literature might not have  
226 paid as close attention to these somatic components. Some [74-76] used task-based attentional  
227 search assessments such as the ANT-I task [78] which had a heavier cognitive load but only  
228 required minor motor responses, while others [79] used questionnaires with less emphasis on  
229 the somatic components and more emphasis on the affective components of anxiety, such as  
230 the State Trait Anxiety Inventory which includes items such as "I worry too much over  
231 something that really doesn't matter" and "I feel calm; I feel secure."

232 Another interesting finding of this paper was that anxiety symptoms were not correlated with  
233 the frontoparietal- or dorsal attention-somatomotor rsFC strength. This paper's findings hence  
234 dispute previous findings about the positive correlation of somatomotor connectivity with  
235 heightened anxiety [80-82] as increased rsFC of the frontoparietal- and dorsal attention-  
236 somatomotor network was found in this study to be associated with lowered anxiety levels.  
237 The findings of past studies mainly clustered around the decreased functioning within the  
238 frontoparietal network during the processing of neutral targets [75, 76, 79, 83] and increased  
239 activity in these portions in tasks that use emotionally laden stimuli [76, 84-86] in individuals  
240 high in trait anxiety or diagnosed with an anxiety disorder. Other studies focusing on the DAN  
241 tend to focus mainly on dorsal attention- amygdala activity [87-90]. A possible reason for this  
242 discrepancy is that some of the previous literature examined clinically anxious populations [85,  
243 86] while this current study investigated rsFC in sub-clinical and non-clinical populations.

244 However, for the rest of the studies that similarly focused on healthy individuals, the cause for  
245 this discrepancy could be a focus for future studies.

246 The last finding of this paper worth mentioning would be that while the HADS.A scale  
247 measured somatic-related anxiety symptoms (such as “I feel tense or 'wound up.'”), the  
248 HADS.D scale does not measure any somatic symptoms related to depression. Yet, ACPN was  
249 found to be a partial mediator in the relationship between attention control and anxiety  
250 symptoms and a complete mediator in the relationship between attention control and depression  
251 symptoms. This may imply that the attention control networks play a more important role in  
252 this relationship. We propose that this may stem from the connection between rumination,  
253 known to impede attention control [91], and the potentially weakened connectivity within the  
254 dorsal attention and frontoparietal somatosensory networks. This reduced connectivity could  
255 hinder individuals from redirecting negative thought patterns and engaging in mindfulness-  
256 enhancing motor activities, thereby potentially exacerbating mood symptoms [92, 93].  
257 Specifically, ruminative thoughts related to self-efficacy can intensify depression symptoms,  
258 while those concerning perceived social failures can heighten anxiety [92]. While rumination  
259 plays a key role in both anxiety and depression symptom perpetuation [94], it is a hallmark  
260 symptom of depression but only a potential symptom of anxiety [95]. Our current study aligns  
261 with the findings of [96], who identified hypoconnectivity between the resting-state functional  
262 connectivity (rsFC) frontoparietal and dorsal attention networks in Major Depressive Disorder  
263 (MDD). However, their study did not explicitly investigate the somatomotor network, likely  
264 due to its primary focus on MDD in general rather than exploring the link between attention  
265 control and depression specifically.

266 The findings of this study would be useful for neuroeducation, “a didactic or experiential-based  
267 intervention that aims to reduce client distress and improve client outcome by helping clients

268 understand the neurological processes underlying mental functioning” [97]. In the context of  
269 this study, neuroeducation would involve informing clients of the neurological processes,  
270 strengthening connectivity in their frontoparietal- or dorsal attention- somatomotor network  
271 which may underlie their poor attention control. This knowledge empowers clients to develop  
272 self-compassion, modify deep-seated cognitive patterns, and normalise the fluctuations in their  
273 personal growth journey [97]. These insights have the potential to alleviate client anxiety,  
274 enhance results, and foster greater cooperation between therapists and their clients. [104].  
275 Furthermore, the findings support therapies that incorporate somatic and attention-based  
276 elements, like mindfulness cognitive-based therapy, which has demonstrated effectiveness in  
277 reducing anxiety and depression symptoms such as rumination [93, 98-100] and enhancing  
278 emotion regulation abilities [101, 102].

279 The findings are subject to some limitations. Firstly, the present study is purely correlational.  
280 Causation between attention control, functional connectivity of the brain and anxiety- and  
281 depression-related symptoms cannot be inferred. Second, attention control was measured via  
282 self-reported questionnaire responses which may be subjective and unreliable compared to  
283 more objective measures of attention control, such as using a Stroop task. Replication of the  
284 present study with more objective measures or with additional measures for corroboration such  
285 as peer-reported measures could increase its validity.

286



287 **Author Contributions**

288 Raye Fion Loh: Conceptualization, Formal analysis, Investigation, Project administration,

289 Software, Visualization, Writing – original draft

290 Savannah Siew Kah Hui: Supervision, Visualization, Writing – review & editing

291 Junhong Yu: Data curation, Funding acquisition, Methodology, Resources, Software,

292 Supervision, Writing – review & editing

## 293   **References**

- 294       1. Kalin NH. Novel insights into pathological anxiety and anxiety-related disorders. *Am*  
295       *J Psychiatry*. 2020;177(3):187-189. DOI: 10.1176/appi.ajp.2020.20010057.
- 296       2. Mathews A, MacLeod C. Cognitive vulnerability to emotional disorders. *Annu Rev*  
297       *Clin Psychol*. 2005;1(1):167-195. DOI: 10.1146/annurev.clinpsy.1.102803.143916.
- 298       3. Rodriguez BF, Bruce SE, Pagano ME, Keller MB. Relationships among psychosocial  
299       functioning, diagnostic comorbidity, and the recurrence of generalized anxiety  
300       disorder, panic disorder, and major depression. *J Anxiety Disord*. 2005;19(7):752-766.  
301       DOI: 10.1016/j.janxdis.2004.10.002.
- 302       4. American Psychiatric Association, DSM-5 Task Force. *Diagnostic and Statistical*  
303       *Manual of Mental Disorders: DSM-5*. American Psychiatric Publishing; 2013.  
304       Available from: <https://DOI.org/10.1176/appi.books.9780890425596>
- 305       5. Goodwin GM. Neuropsychological and neuroimaging evidence for the involvement of  
306       the frontal lobes in depression. *J Psychopharmacol*. 1997;11(2):115-122. DOI:  
307       10.1177/026988119701100204.
- 308       6. Austin MP, Ross M, Murray C, O'Carroll RE, Ebmeier KP, Goodwin GM. Cognitive  
309       function in major depression. *J Affect Disord*. 1992;25(1):21-29. DOI:10.1016/0165-  
310       0327(92)90089-O.
- 311       7. Beats B. The biological origin of depression in later life. *Int J Geriatr Psychiatry*.  
312       1996;11:349-354.       DOI:10.1002/(SICI)1099-1166(199604)11:4<349::AID-  
313       GPS457>3.0.CO; 2-T.
- 314       8. Purcell R, Maruff P, Kyrios M, Pantelis C. Neuropsychological function in young  
315       patients with unipolar major depression. *Psychol Med*. 1997;27(6):1277-1285. DOI:  
316       10.1017/s0033291797005448.

- 317 9. Merriam EP, Thase ME, Haas GL, Keshavan MS, Sweeney JA. Prefrontal cortical  
318 dysfunction in depression determined by Wisconsin Card Sorting Test Performance.  
319 Am J Psychiatry. 1999;156(5):780-782. DOI: 10.1176/ajp.156.5.780.
- 320 10. Nebes RD, Pollock BG, Houck PR, Butters MA, Mulsant BH, Zmuda MD, Reynolds  
321 CF 3rd. Persistence of cognitive impairment in geriatric patients following  
322 antidepressant treatment: a randomized, double-blind clinical trial with nortriptyline  
323 and paroxetine. J Psychiatr Res. 2003;37(2):99-108. DOI: 10.1016/s0022-  
324 3956(02)00085-7.
- 325 11. Baudic S, Tzortzis C, Barba GD, Traykov L. Executive deficits in elderly patients with  
326 major unipolar depression. J Geriatr Psychiatry Neurol. 2004;17(4):195-201.  
327 DOI:10.1177/0891988704269823.
- 328 12. Reppermund S, Zihl J, Lucae S, Horstmann S, Kloiber S, Holsboer F, Ising M.  
329 Persistent Cognitive impairment in depression: The role of Psychopathology and  
330 Altered Hypothalamic-Pituitary-Adrenocortical (HPA) System regulation. Biol  
331 Psychiatry. 2007;62(5):400-406. DOI: 10.1016/j.biopsych.2006.09.027.
- 332 13. Austin MP, Mitchell P, Goodwin GM. Cognitive deficits in depression: possible  
333 implications for functional neuropathology. Br J Psychiatry. 2001;178:200-206.  
334 DOI:10.1192/bjp.178.3.200.
- 335 14. Smith TW, Christensen AJ, Peck JR, Ward JR. Cognitive distortion, helplessness, and  
336 depressed mood in rheumatoid arthritis: A four-year longitudinal analysis. Health  
337 Psychol. 1994;13(3):213-217. DOI: 10.1037/0278-6133.13.3.213.
- 338 15. Brébion G, Smith MJ, Widlöcher D. Discrimination and response bias in memory:  
339 effects of depression severity and psychomotor retardation. Psychiatry Res  
340 Neuroimaging. 1997;70(2):95-103. DOI:10.1016/s0165-1781(97)03098-9.

- 341 16. Porter RJ, Gallagher P, Thompson JM, Young AH. Neurocognitive impairment in drug-  
342 free patients with major depressive disorder. *Br J Psychiatry*. 2003;182:214-220. DOI:  
343 10.1192/bjp.182.3.214.
- 344 17. Butters MA, Whyte EM, Nebes RD, Begley AE, Dew MA, Mulsant BH, Zmuda MD,  
345 Bhalla R, Meltzer CC, Pollock BG, Reynolds CF 3rd, Becker JT. The nature and  
346 determinants of neuropsychological functioning in late-life depression. *Arch Gen*  
347 *Psychiatry*. 2004;61(6):587-595. DOI: 10.1001/archpsyc.61.6.587.
- 348 18. Naismith SL, Hickie IB, Turner KA, Little C, Winter VR, Ward PB, Wilhelm K,  
349 Mitchell PB, Parker G. Neuropsychological Performance in Patients With Depression  
350 is Associated With Clinical, Etiological and Genetic Risk Factors. *J Clin Exp*  
351 *Neuropsychol*. 2003;25(6):866-877. DOI: 10.1076/jcen.25.6.866.16472.
- 352 19. Bhalla RK, Butters MA, Zmuda M, Seligman K, Mulsant BH, Pollock BG, Reynolds  
353 CF. Does education moderate neuropsychological impairment in late-life depression?  
354 *Int J Geriatr Psychiatry*. 2005;20(5):413-417. DOI:10.1002/gps.1296.
- 355 20. Cataldo MG, Nobile M, Lorusso ML, Battaglia M, Molteni M. Impulsivity in depressed  
356 children and adolescents: A comparison between behavioral and neuropsychological  
357 data. *Psychiatry Res Neuroimaging*. 2005;136(2-3):123-133. DOI:  
358 10.1016/j.psychres.2004.12.012.
- 359 21. Baune B, Aljeesh Y. The association of psychological stress and health related quality  
360 of life among patients with stroke and hypertension in Gaza Strip. *Ann Gen Psychiatry*.  
361 2006;5(1):6. DOI:10.1186/1744-859X-5-6.
- 362 22. Sheline YI. Depression and the hippocampus: Cause or effect? *Biol Psychiatry*.  
363 2011;70(4):308-309. DOI: 10.1016/j.biopsych.2011.06.006.
- 364 23. Abas M, Sahakian BJ, Levy R. Neuropsychological deficits and CT scan changes in  
365 elderly depressives. *Psychological Medicine*. 1990 Aug 1;20(3):507-20.

- 366 24. Elliott R, Sahakian BJ, McKay AP, Herrod JJ, Robbins TW, Paykel ES.  
367 Neuropsychological impairments in unipolar depression: the influence of perceived  
368 failure on subsequent performance. *Psychol Med.* 1996;26(5):975-989. DOI:  
369 10.1017/s0033291700035303.
- 370 25. Hirschfield RM. The comorbidity of major depression and anxiety disorders. *Prim Care*  
371 *Companion J Clin Psychiatry.* 2001;03(06):244-254. DOI: 10.4088/pcc.v03n0609.
- 372 26. De Raedt R, Koster EH. Understanding vulnerability for depression from a cognitive  
373 neuroscience perspective: A reappraisal of attentional factors and a new conceptual  
374 framework. *Cogn Affect Behav Neurosci.* 2010;10(1):50-70. DOI:  
375 10.3758/cabn.10.1.50.
- 376 27. Disner SG, Beevers CG, Haigh EA, Beck AT. Neural mechanisms of the cognitive  
377 model of depression. *Nat Rev Neurosci.* 2011;12(8):467-477. DOI: 10.1038/nrn3027.
- 378 28. Joormann J, Gotlib IH. Emotion regulation in depression: Relation to cognitive  
379 inhibition. *Cogn Emotion.* 2010;24(2):281-298. DOI: 10.1080/02699930903407948.
- 380 29. Mogg K, Bradley BP. Anxiety and attention to threat: Cognitive mechanisms and  
381 treatment with attention bias modification. *Behav Res Ther.* 2016;87:76-108. DOI:  
382 10.1016/j.brat.2016.08.001.
- 383 30. Biswal B, Zerrin Yetkin F, Haughton VM, Hyde JS. Functional connectivity in the  
384 motor cortex of resting human brain using echo-planar MRI. *Magn Reson Med.*  
385 1995;34(4):537-541. DOI:10.1002/mrm.1910340409
- 386 31. Chou YH, Sundman M, Whitson H, et al. Maintenance and Representation of Mind  
387 Wandering during Resting-State fMRI. *Sci Rep.* 2017;7:40722. DOI:  
388 10.1038/srep40722.

- 389 32. Rodríguez MR, Nuevo R, Chatterji S, Ayuso-Mateos JL. Definitions and factors  
390 associated with subthreshold depressive conditions: A systematic review. BMC  
391 Psychiatry. 2012;12(1). DOI: 10.1186/1471-244x-12-181.
- 392 33. Cuijpers P, Smit F. Subthreshold depression: A clinically relevant condition? Eur  
393 Psychiatry. 2010;25:153. DOI: 10.1016/s0924-9338(10)70153-x.
- 394 34. Haller H, Cramer H, Lauche R, Gass F, Dobos GJ. The prevalence and burden of  
395 subthreshold generalized anxiety disorder: A systematic review. BMC Psychiatry.  
396 2014;14(1). DOI: 10.1186/1471-244x-14-128.
- 397 35. Rucci P, Gherardi S, Tansella M, Piccinelli M, Berardi D, Bisoffi G, Corsino MA, Pini  
398 S. Subthreshold psychiatric disorders in primary care: prevalence and associated  
399 characteristics. J Affect Disord. 2003;76(1-3):171-181. DOI:10.1016/s0165-  
400 0327(02)00087-3.
- 401 36. Chachamovich E, Fleck M, Laidlaw K, Power M. Impact of major depression and  
402 subsyndromal symptoms on quality of life and attitudes toward aging in an international  
403 sample of older adults. Gerontologist. 2008;48(5):593-602. DOI:  
404 10.1093/geront/48.5.593.
- 405 37. Goldney RD, Fisher LJ, Dal Grande E, Taylor AW. Subsyndromal depression:  
406 Prevalence, use of health services and quality of life in an Australian population. Soc  
407 Psychiatry Psychiatr Epidemiol. 2004;39(4):293-298. DOI: 10.1007/s00127-004-0745-  
408 5.
- 409 38. Cuijpers P, Koole SL, van Dijke A, Roca M, Li J, Reynolds CF. Psychotherapy for  
410 subclinical depression: Meta-analysis. Br J Psychiatry. 2014;205(4):268-274. DOI:  
411 10.1192/bjp.bp.113.138784.

- 412 39. Beesdo K, Knappe S, Pine DS. Anxiety and anxiety disorders in children and  
413 adolescents: Developmental issues and implications for DSM-V. *Psychiatr Clin North*  
414 *Am.* 2009;32(3):483-524. DOI:10.1016/j.psc.2009.06.002.
- 415 40. Yang X-Hua, Huang J, Zhu C-Ying, Wang Y-Fei, Cheung EFC, Chan RC-K, Xie G-  
416 rong. Motivational deficits in effort-based decision making in individuals with  
417 subsyndromal depression, first-episode and remitted depression patients. *Psychiatry*  
418 *Res.* 2014;220(3):874-882. DOI: 10.1016/j.psychres.2014.08.056.
- 419 41. Sharp LK, Lipsky MS. Screening for depression across the lifespan: a review of  
420 measures for use in primary care settings. *Am Fam Physician.* 2002;66(6):1001-1009.
- 421 42. Babayan A, Erbey M, Kumral D, Reinelt JD, Reiter AM, Röbbig J, Schaare HL, Uhlig  
422 M, Anwander A, Bazin PL, Horstmann A, Lampe L, Nikulin VV, Okon-Singer H,  
423 Preusser S, Pampel A, Rohr CS, Sacher J, Thöne-Otto A, ... Villringer A. A Mind-  
424 brain-body Dataset of MRI, EEG, Cognition, Emotion, and Peripheral Physiology in  
425 Young and Old Adults. *Sci Data.* 2019;6(1). DOI:10.1038/sdata.2018.308.
- 426 43. Mendes N, Oligschläger S, Lauckner M, Golchert J, Huntenburg JM, Falkiewicz M, et  
427 al. A functional connectome phenotyping dataset including cognitive state and  
428 personality measures. *Sci Data.* 2019;6:180307. DOI: 10.1038/sdata.2018.307.
- 429 44. Derryberry D, Reed MA. Anxiety and attentional focusing: Trait, state and hemispheric  
430 influences. *Pers Individ Dif.* 1998;25(4):745-761. DOI: 10.1016/s0191-  
431 8869(98)00117-2.
- 432 45. Zigmond AS, Snaith RP. The hospital anxiety and depression scale. *Acta Psychiatr*  
433 *Scand.* 1983;67(6):361-370. DOI: 10.1111/j.1600-0447.1983.tb09716.x.
- 434 46. Segonne F. A hybrid approach to the skull stripping problem in MRI. *NeuroImage.*  
435 2004. DOI: 10.1016/s1053-8119(04)00188-0.

- 436 47. Fischl B. Automatically parcellating the human cerebral cortex. *Cereb Cortex*.  
437 2004;14(1):11-22. DOI: 10.1093/cercor/bhg087.
- 438 48. Fischl B, Salat DH, Busa E, Albert M, Dieterich M, Haselgrove C, van der Kouwe A,  
439 Killiany R, Kennedy D, Klaveness S, Montillo A, Makris N, Rosen B, Dale AM. Whole  
440 brain segmentation. *Neuron*. 2002;33(3):341-355. DOI: 10.1016/s0896-  
441 6273(02)00569-x.
- 442 49. Sled JG, Zijdenbos AP, Evans AC. A nonparametric method for automatic correction  
443 of intensity nonuniformity in MRI Data. *IEEE Trans Med Imaging*. 1998;17(1):87-97.  
444 DOI: 10.1109/42.668698.
- 445 50. Dale AM, Fischl B, Sereno MI. Cortical surface-based analysis. *NeuroImage*.  
446 1999;9(2):179-194. DOI: 10.1006/nimg.1998.0395.
- 447 51. Fischl B, Dale AM. Measuring the thickness of the human cerebral cortex from  
448 Magnetic Resonance Images. *Proc Natl Acad Sci*. 2000;97(20):11050-11055. DOI:  
449 10.1073/pnas.200033797.
- 450 52. Fischl B, Sereno MI, Dale AM. Cortical surface-based analysis. *NeuroImage*.  
451 1999;9(2):195-207. DOI: 10.1006/nimg.1998.0396.
- 452 53. Esteban O, Markiewicz CJ, Blair RW, Moodie CA, Isik AI, Erramuzpe A, Kent JD,  
453 Goncalves M, DuPre E, Snyder M, Oya H, Ghosh SS, Wright J, Durnez J, Poldrack  
454 RA, Gorgolewski KJ. FMRIPrep: A robust preprocessing pipeline for functional MRI.  
455 *Nat Methods*. 2018;16(1):111-116. DOI: 10.1038/s41592-018-0235-4.
- 456 54. Cox RW. AFNI: Software for analysis and visualization of functional magnetic  
457 resonance neuroimages. *Comput Biomed Res*. 1996;29(3):162-173. DOI:  
458 10.1006/cbmr.1996.0014.



- 459 55. Jenkinson M, Bannister P, Brady M, Smith S. Improved optimization for the robust and  
460 accurate linear registration and motion correction of brain images. *NeuroImage*.  
461 2002;17(2):825-841. DOI: 10.1006/nimg.2002.1132.
- 462 56. Greve DN, Fischl B. Accurate and robust brain image alignment using boundary-based  
463 registration. *NeuroImage*. 2009;48(1):63-72. DOI: 10.1016/j.neuroimage.2009.06.060.
- 464 57. Power JD, Mitra A, Laumann TO, Snyder AZ, Schlaggar BL, Petersen SE. Methods to  
465 detect, characterize, and remove motion artifact in resting state fMRI. *NeuroImage*.  
466 2014;84:320-341. DOI: 10.1016/j.neuroimage.2013.08.048.
- 467 58. Fan L, Li H, Zhuo J, Zhang Y, Wang J, Chen L, Yang Z, Chu C, Xie S, Laird AR, Fox  
468 PT, Eickhoff SB, Yu C, Jiang T. The human Brainnetome Atlas: A new brain atlas  
469 based on Connectional Architecture. *Cereb Cortex*. 2016;26(8):3508-3526. DOI:  
470 10.1093/cercor/bhw157.
- 471 59. Gracia-Tabuenca Z, Alcauter S. NBR: Network-based R-statistics for (unbalanced)  
472 longitudinal samples. *BioRxiv* (Cold Spring Harbor Lab). 2020. DOI:  
473 10.1101/2020.11.07.373019.
- 474 60. Tingley D, Yamamoto T, Hirose K, Keele L, Imai K. mediation: R Package for Causal  
475 Mediation Analysis. *J Stat Softw*. 2014;59(5). DOI: 10.18637/jss.v059.i05.
- 476 61. Yeo BT, Krienen FM, Sepulcre J, Sabuncu MR, Lashkari D, Hollinshead M, Roffman  
477 JL, Smoller JW, Zöllei L, Polimeni JR, Fischl B, Liu H, Buckner RL. The organization  
478 of the human cerebral cortex estimated by intrinsic functional connectivity. *J*  
479 *Neurophysiol*. 2011;106(3):1125-1165. DOI: 10.1152/jn.00338.2011.
- 480 62. Bu X, Liang K, Lin Q, Gao Y, Qian A, Chen H, Chen W, Wang M, Yang C, Huang X.  
481 Exploring white matter functional networks in children with attention-  
482 deficit/hyperactivity disorder. *Brain Communications*. 2020;2(2). DOI:  
483 10.1093/braincomms/fcaa113.

- 484 63. Wang M, Hu Z, Liu L, Li H, Qian Q, Niu H. Disrupted functional brain connectivity  
485 networks in children with attention-deficit/hyperactivity disorder: Evidence from  
486 resting-state functional near-infrared spectroscopy. *Neurophotonics*. 2020;7(01):1.  
487 DOI: 10.1117/1.nph.7.1.015012.
- 488 64. Jung M, Tu Y, Park J, Jorgenson K, Lang C, Song W, Kong J. Surface-based shared  
489 and distinct resting functional connectivity in attention-deficit hyperactivity disorder  
490 and autism spectrum disorder. *Br J Psychiatry*. 2019;214(06):339-344. DOI:  
491 10.1192/bjp.2018.248.
- 492 65. O'Halloran L, Cao Z, Ruddy K, Jollans L, Albaugh MD, Aleni A, Potter AS, Vahey N,  
493 Banaschewski T, Hohmann S, Bokde ALW, Bromberg U, Büchel C, Quinlan EB,  
494 Desrivières S, Flor H, Frouin V, Gowland P, Heinz A, Whelan R. Neural circuitry  
495 underlying sustained attention in healthy adolescents and in ADHD symptomatology.  
496 *NeuroImage*. 2018;169:395-406. DOI: 10.1016/j.neuroimage.2017.12.030.
- 497 66. Kaiser ML, Schoemaker MM, Albaret JM, Geuze RH. What is the evidence of impaired  
498 motor skills and motor control among children with attention deficit hyperactivity  
499 disorder (ADHD)? Systematic review of the literature. *Res Dev Disabil*. 2015;36C:338-  
500 357. DOI: 10.1016/j.ridd.2014.09.023.
- 501 67. Hsiao SS, O'Shaughnessy DM, Johnson KO. Effects of selective attention on spatial  
502 form processing in monkey primary and secondary somatosensory cortex. *J*  
503 *Neurophysiol*. 1993;70(1):444-447. DOI: 10.1152/jn.1993.70.1.444.
- 504 68. Burton H, Sinclair RJ. Attending to and remembering tactile stimuli. *J Clin*  
505 *Neurophysiol*. 2000;17(6):575-591. DOI: 10.1097/00004691-200011000-00004.
- 506 69. Burton H, Sinclair RJ. Attending to and Remembering Tactile Stimuli. *J Clin*  
507 *Neurophysiol*. 2000;17(6):575-591. DOI: 10.1097/00004691-200011000-00004.

- 508 70. Eimer M, Forster B. Modulations of early somatosensory ERP components by transient  
509 and sustained spatial attention. *Exp Brain Res.* 2003;151(1):24-31. DOI:  
510 10.1007/s00221-003-1437-1.
- 511 71. Forster B, Eimer M. The attentional selection of spatial and non-spatial attributes in  
512 touch: ERP evidence for parallel and independent processes. *Biol Psychol.*  
513 2004;66(1):1-20. DOI: 10.1016/j.biopsycho.2003.08.001.
- 514 72. Gherri E, Forster B. Attention to the body depends on eye-in-orbit position. *Front*  
515 *Psychol.* 2014;5. DOI: 10.3389/fpsyg.2014.00683.
- 516 73. Gomez-Ramirez M, Trzcinski NK, Mihalas S, Niebur E, Hsiao SS. Temporal  
517 correlation mechanisms and their role in feature selection: A single-unit study in  
518 primate somatosensory cortex. *PLoS Biol.* 2014;12(11). DOI:  
519 10.1371/journal.pbio.1002004.
- 520 74. Bishop SJ. Trait anxiety and impoverished prefrontal control of attention. *Nat Neurosci.*  
521 2009;12(1):92-98. DOI:10.1038/nn.2242.
- 522 75. Bishop SJ, Jenkins R, Lawrence AD. Neural processing of fearful faces: Effects of  
523 anxiety are gated by perceptual capacity limitations. *Cereb Cortex.* 2007;17(7):1595-  
524 1603. DOI:10.1093/cercor/bhl070.
- 525 76. Pannu-Hayes J, LaBar KS, Petty CM, McCarthy G, Morey RA. Alterations in the neural  
526 circuitry for emotion and attention associated with posttraumatic stress  
527 symptomatology. *Psychiatry Res Neuroimaging.* 2009;172(1):7-15. DOI:  
528 10.1016/j.psychresns.2008.05.005.
- 529 77. Pacheco-Unguetti AP, Acosta A, Callejas A, Lupiáñez J. Attention and anxiety.  
530 *Psychol Sci.* 2010;21(2):298-304. DOI: 10.1177/0956797609359624.
- 531 78. Callejas A, Lupiáñez J, Tudela P. The three attentional networks: on their independence  
532 and interactions. *Brain Cogn.* 2004;54(3):225-227. DOI: 10.1016/j.bandc.2004.02.012.

- 533 79. Basten U, Stelzel C, Fiebach CJ. Trait anxiety modulates the neural efficiency of  
534 inhibitory control. *J Cogn Neurosci*. 2011;23(10):3132-3145.  
535 DOI:10.1162/jocn\_a\_00003.
- 536 80. Cui H, Zhang J, Liu Y, Li Q, Li H, Zhang L, Hu Q, Cheng W, Luo Q, Li J, Li W, Wang  
537 J, Feng J, Li C, Northoff G. Differential alterations of resting-state functional  
538 connectivity in generalized anxiety disorder and panic disorder. *Hum Brain Mapp*.  
539 2016;37(4):1459-1473. DOI: 10.1002/hbm.23113.
- 540 81. Li X, Zhang M, Li K, Zou F, Wang Y, Wu X, Zhang H. The Altered Somatic Brain  
541 Network in Anxiety. *Front Psychiatry*. 2019;10. DOI: 10.3389/fpsyt.2019.00465.
- 542 82. Bouziane I, Das M, Friston KJ, Caballero-Gaudes C, Ray D. Enhanced top-down  
543 sensorimotor processing in somatic anxiety. *Translational Psychiatry*. 2022 Jul  
544 25;12(1).
- 545 83. Bishop S, Duncan J, Brett M, Lawrence AD. Prefrontal cortical function and anxiety:  
546 Controlling attention to threat-related stimuli. *Nat Neurosci*. 2004;7(2):184-188.  
547 DOI:10.1038/nn1173.
- 548 84. Telzer EH, Mogg K, Bradley BP, Mai X, Ernst M, Pine DS, Monk CS. Relationship  
549 between trait anxiety, prefrontal cortex, and attention bias to angry faces in children  
550 and adolescents. *Biol Psychol*. 2008;79(2):216-222. DOI:  
551 10.1016/j.biopsycho.2008.05.004.
- 552 85. Goldin PR, Manber T, Hakimi S, Canli T, Gross JJ. Neural bases of social anxiety  
553 disorder. *Arch Gen Psychiatry*. 2009;66(2):170. DOI:  
554 10.1001/archgenpsychiatry.2008.525.
- 555 86. Etkin A, Keller KE, Schatzberg AF, Menon V, Greicius MD. Disrupted amygdalar  
556 subregion functional connectivity and evidence for a compensatory network in

- 557 generalized anxiety disorder. *NeuroImage*. 2010;47. DOI: 10.1016/s1053-  
558 8119(09)70428-8.
- 559 87. Kim MJ, Gee DG, Loucks RA, Davis FC, Whalen PJ. Anxiety dissociates dorsal and  
560 ventral medial prefrontal cortex functional connectivity with the amygdala at rest.  
561 *Cereb Cortex*. 2010;21(7):1667-1673. DOI: 10.1093/cercor/bhq237.
- 562 88. Vaidya CJ, Gordon EM. Phenotypic variability in resting-state functional connectivity:  
563 Current status. *Brain Connect*. 2013;3(2):99-120. DOI: 10.1089/brain.2012.0110.
- 564 89. He Y, Xu T, Zhang W, Zuo XN. Lifespan anxiety is reflected in human amygdala  
565 cortical connectivity. *Hum Brain Mapp*. 2016;37(3):1178-1193. DOI:  
566 10.1002/hbm.23094.
- 567 90. Sylvester CM, Yu Q, Srivastava AB, Marek S, Zheng A, Alexopoulos D, Smyser CD,  
568 Shimony JS, Ortega M, Dierker DL, Patel GH, Nelson SM, Gilmore AW, McDermott  
569 KB, Berg JJ, Drysdale AT, Perino MT, Snyder AZ, Raut RV, Dosenbach NU.  
570 Individual-specific functional connectivity of the amygdala: A substrate for precision  
571 psychiatry. *Proc Natl Acad Sci*. 2020;117(7):3808-3818. DOI:  
572 10.1073/pnas.1910842117.
- 573 91. Yaroslavsky I, Allard ES, Sanchez-Lopez A. Can't look away: Attention control deficits  
574 predict rumination, depression symptoms and depressive affect in daily life. *J Affect*  
575 *Disord*. 2019;245:1061-1069. DOI: 10.1016/j.jad.2018.11.036.
- 576 92. Hsu KJ, Beard C, Rifkin L, Dillon DG, Pizzagalli DA, Björgvinsson T. Transdiagnostic  
577 mechanisms in depression and anxiety: The role of rumination and attentional control.  
578 *J Affect Disord*. 2015;188:22-27. DOI: 10.1016/j.jad.2015.08.008.
- 579 93. Blanck P, Perleth S, Heidenreich T, Kröger P, Ditzen B, Bents H, et al. Effects of  
580 mindfulness exercises as stand-alone intervention on symptoms of anxiety and

- 581 depression: Systematic review and meta-analysis. Behaviour Research and Therapy.  
582 2018 Mar;102:25–35.
- 583 94. Michl LC, McLaughlin KA, Shepherd K, Nolen-Hoeksema S. Rumination as a  
584 Mechanism Linking Stressful Life Events to Symptoms of Depression and Anxiety:  
585 Longitudinal Evidence in Early Adolescents and Adults. J Abnorm Psychol.  
586 2013;122(2):339. doi:10.1037/a0031994.
- 587 95. Olatunji BO, Naragon-Gainey K, Wolitzky-Taylor KB. Specificity of rumination in  
588 anxiety and depression: A multimodal meta-analysis. Clin Psychol Sci Pract.  
589 2013;20(3):225-257. DOI: 10.1037/h0101719.
- 590 96. Kaiser RH, Andrews-Hanna JR, Wager TD, Pizzagalli DA. Large-scale network  
591 dysfunction in major depressive disorder. JAMA Psychiatry. 2015;72(6):603. DOI:  
592 10.1001/jamapsychiatry.2015.0071.
- 593 97. Miller R. Neuroeducation: Integrating brain-based psychoeducation into clinical  
594 practice. J Ment Health Couns. 2016;38(2):103-115. DOI: 10.17744/mehc.38.2.02.
- 595 98. Papageorgiou C, Wells A. Treatment of recurrent major depression with attention  
596 training. Cogn Behav Pract. 2000;7:407-413.
- 597 99. Siegle GJ, Ghinassi F, Thase ME. Neurobehavioral therapies in the 21st century:  
598 summary of an emerging field and an extended example of cognitive control training  
599 for depression. Cogn Ther Res. 2007;31:235-262. DOI: 10.1007/s10608-006-9118-6.
- 600 100. Siegle GJ, Price RB, Jones NP, Ghinassi F, Painter T, Thase ME. You gotta  
601 work at it: pupillary indices of task focus are prognostic for response to a  
602 neurocognitive intervention for rumination in depression. Clin Psychol Sci.  
603 2014;2:455-471. DOI: 10.1177/2167702614536160.
- 604 101. Gyurak A, Ayduk O, Gross JJ. Training Executive Functions: Emotion  
605 Regulation and Affective Consequences.

- 606 102. Bomyea J, Amir N. The Effect of an Executive Functioning Training Program  
607 on Working Memory Capacity and Intrusive Thoughts. *Cognitive Therapy and*  
608 *Research*. 2011 May 13;35(6):529–35.
- 609 103. Burton H, Raichle M, Snyder A, Sinclair R, MacLeod A-M, Abend N. Tactile  
610 Attention Tasks Enhance Activation in Somatosensory Regions of Parietal Cortex: a  
611 Positron Emission Tomography Study. *Cereb Cortex*. 1999;9(7):662-674. DOI:  
612 10.1093/cercor/9.7.662.
- 613 104. Miller R, Beeson ET. *The neuroeducation toolbox: practical translations of*  
614 *neuroscience in counseling and psychotherapy*. San Diego, Ca: Cognella Academic  
615 Publishing; 2021.

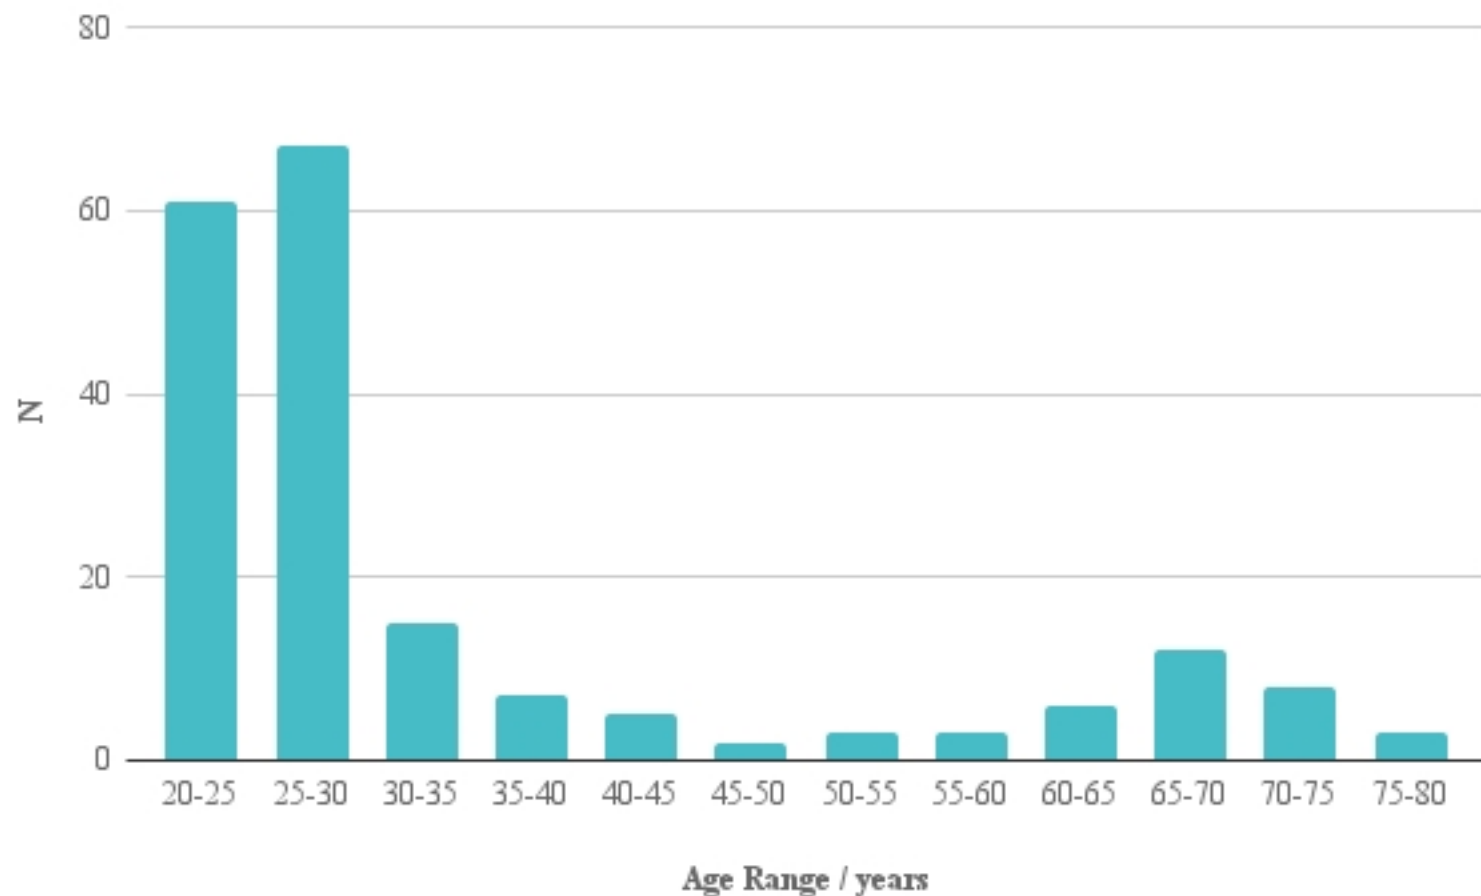

Figure 1. Summary of the Age Range of Participants



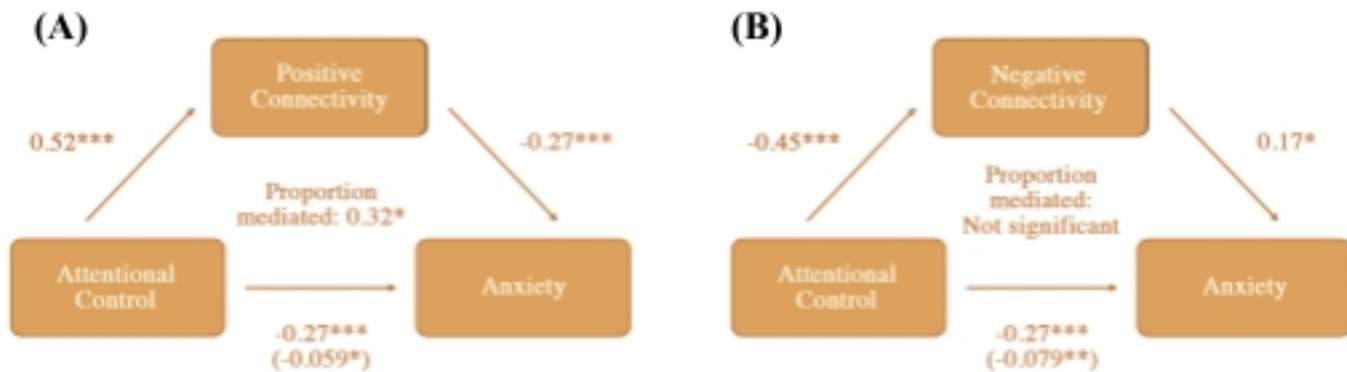

Figure 2. (A) Chord diagram depicting att

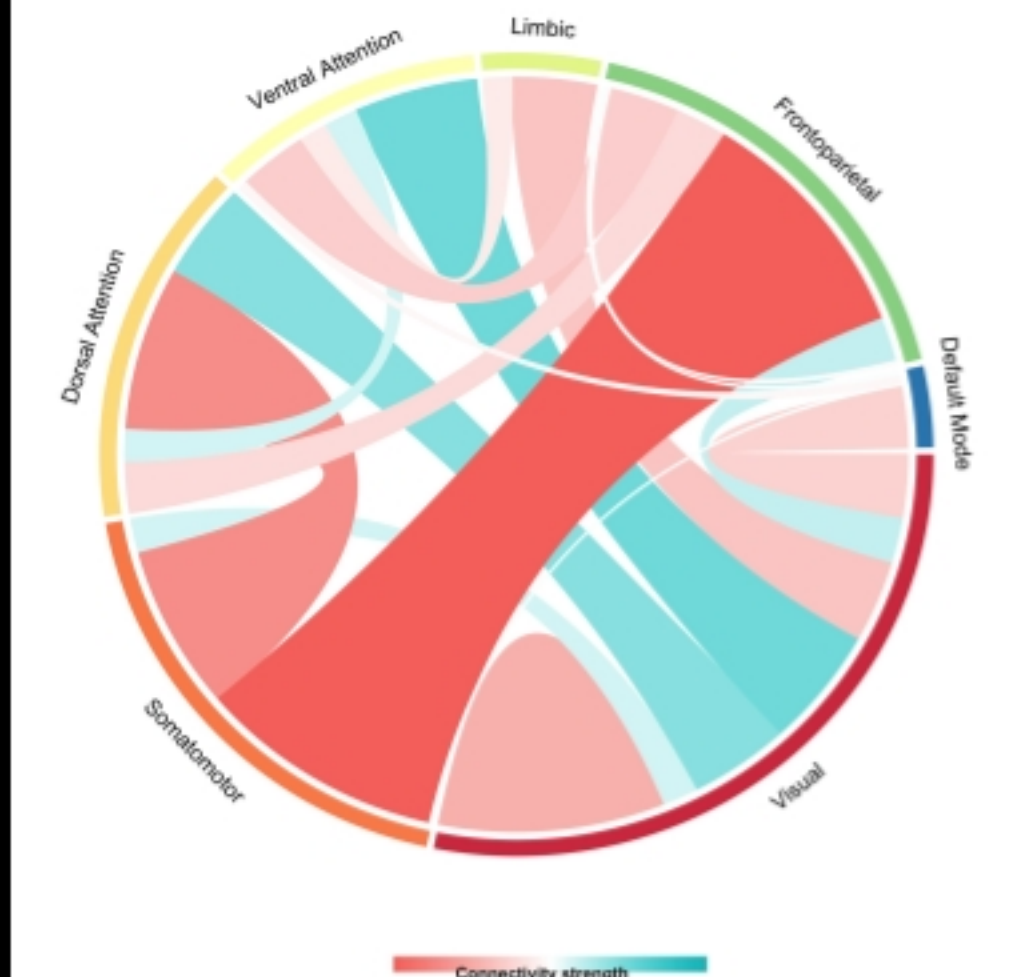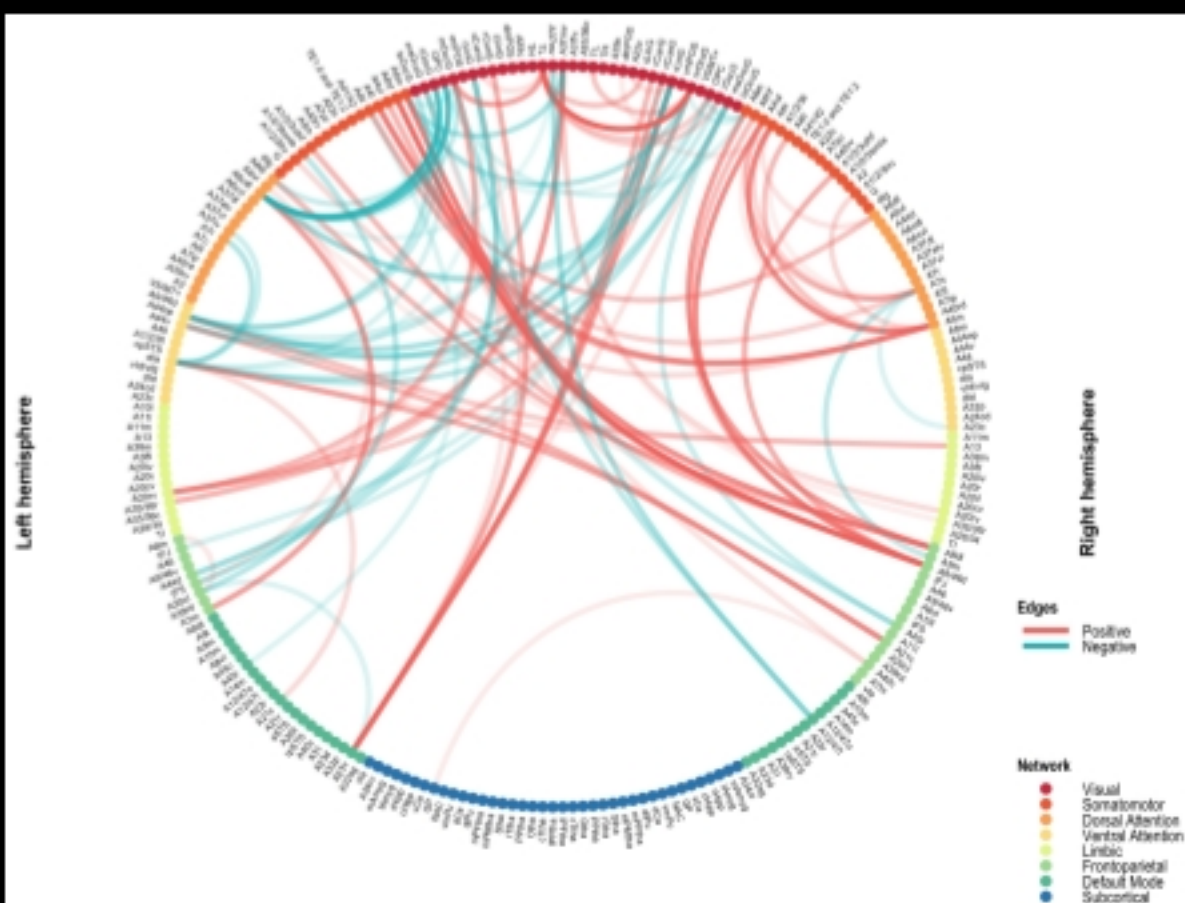

Figure 3. Figure 3. Visualisation of me

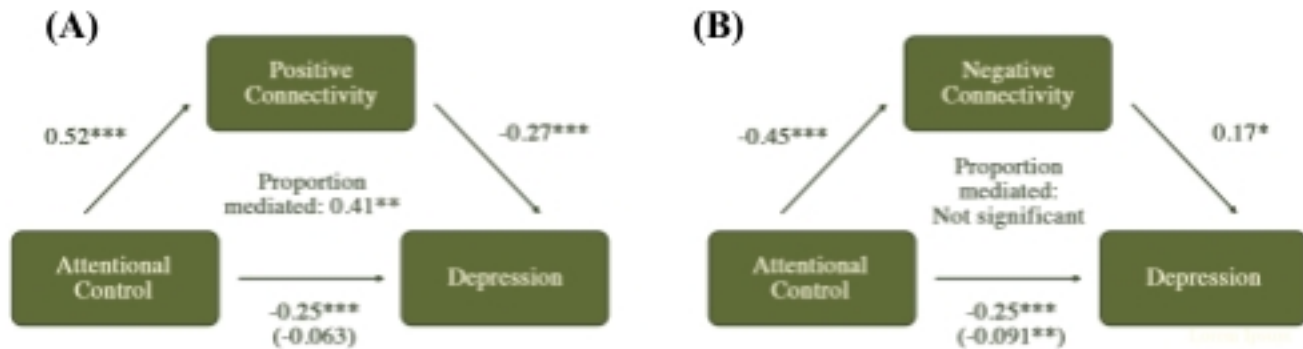

Figure 4. Visualisation of mediation model
